# Supplementary material
Source: PubMed Central journal article supplement (PMC3618671)
Supplement: NIHMS168679-supplement-Supplementary_Figure.pdf [file NIHMS168679-supplement-Supplementary_Figure.pdf]

## Supplementary Material

“Acetyl-coenzyme A synthetase 2 is a nuclear protein required for replicative longevity in *Saccharomyces cerevisiae*”

Alaric A. Falcón, Shaoping Chen, Michael S. Wood, and John P. Aris

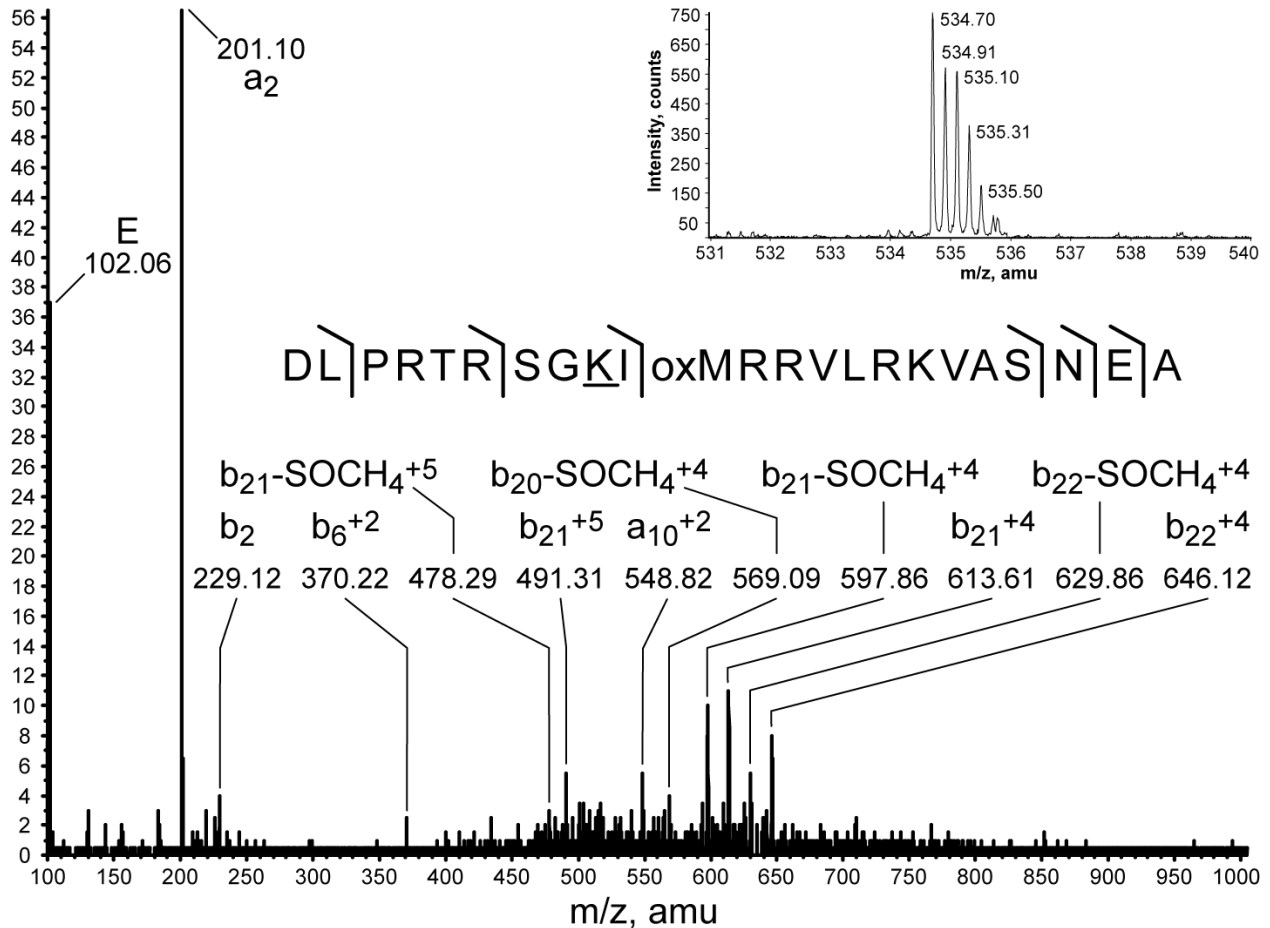

Supplementary Figure. Mass spectrometry analysis of Acs2p. An MS/MS spectrum of the 23 amino acid peptide containing K<sub>637</sub> (*underlined*) is shown. Microgram quantities (10-50 pmol) of Acs2p were immunoprecipitated with mAb 40E10 (see Fig. 1E), gel purified, and digested with Asp-N. Proteolytic fragments were separated by reverse phase HPLC and analyzed by tandem MS. A peak corresponding to DLPRTRSGK<sub>637</sub>IoxMRRVLRKVASNEA was identified at m/z 534.7. Sequence ions (a and b type) from this peptide were produced by collision-induced dissociation and identified by manual interpretation of tandem MS data in conjunction ion masses predicted with MS-Product. Ions and masses are indicated for the corresponding peaks. Inset: the expanded m/z region of a full scan mass spectrum shows the accurate mass for the Asp-N derived peptide containing Lys-637 (+5 charge state).
